# Supplementary material for: Genome-scale analysis of Arabidopsis splicing-related protein kinase families reveals roles in abiotic stress adaptation
Source: PubMed Central journal article supplement (PMC9587599; doi:10.1186/s12870-022-03870-9), 2022-10-22
Supplement: 12870_2022_3870_MOESM1_ESM.pdf [file 12870_2022_3870_MOESM1_ESM.pdf]

SRPKAFCPRPSAR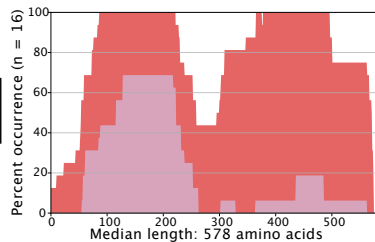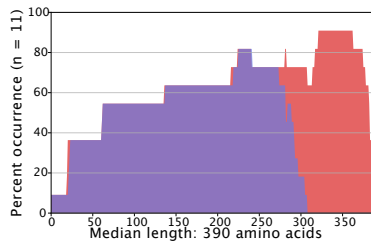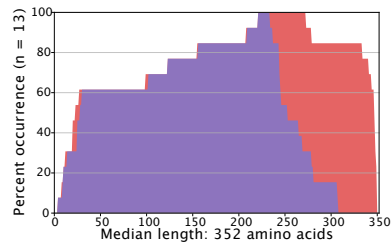Hacrobia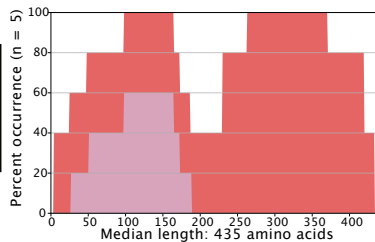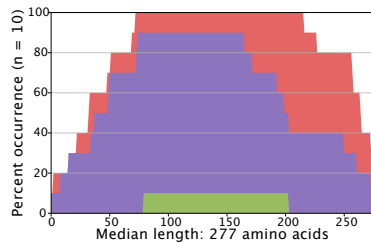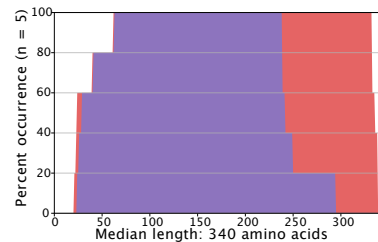Rhodophytes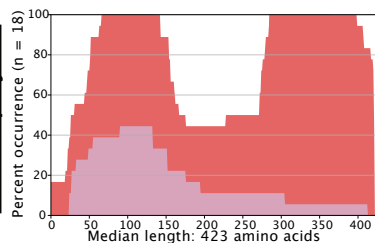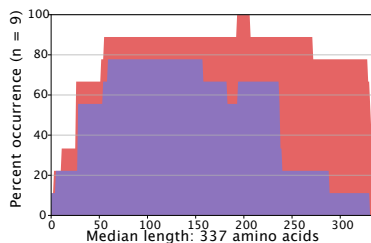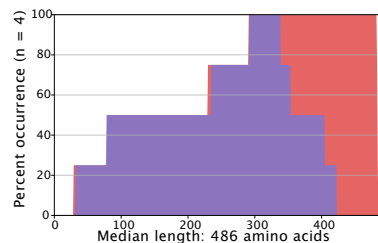Chlorophytes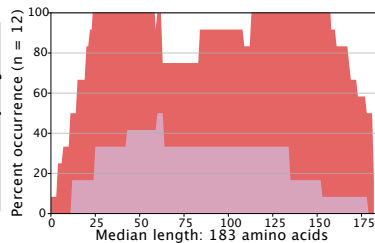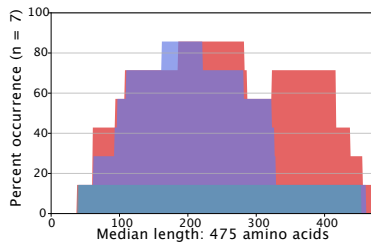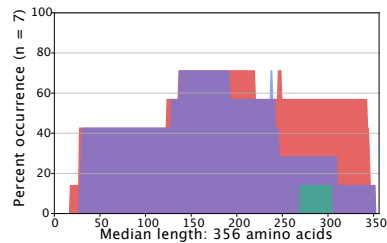

■ Pkinase   
 ■ Pkinase\_Tyr   
 ■ Sulfotransfer\_1   
 ■ RIO1   
 ■ Kinase-like
