# Supplementary material for: Genome-scale analysis of Arabidopsis splicing-related protein kinase families reveals roles in abiotic stress adaptation
Source: PubMed Central journal article supplement (PMC9587599; doi:10.1186/s12870-022-03870-9), 2022-10-22

## Supplemental File 4

The follow file contains raw phylogenetic tress for SRPK, AFC, and PRP4K protein families. Each tree contains node supports and is rooted to human orthologous proteins.

the order of the trees is as follows:

- maximum likelihood (IQTree) SRPK
- maximum likelihood (IQTree) AFC
- maximum likelihood (IQTree) PRP4K
- Bayesian (Mr.Bayes) SRPK
- Bayesian (Mr.Bayes) AFC
- Bayesian (Mr.Bayes) PRP4K
- maximum likelihood (PhyML) SRPK
- maximum likelihood (PhyML) AFC
- maximum likelihood (PhyML) PRP4K

Tree scale: 1


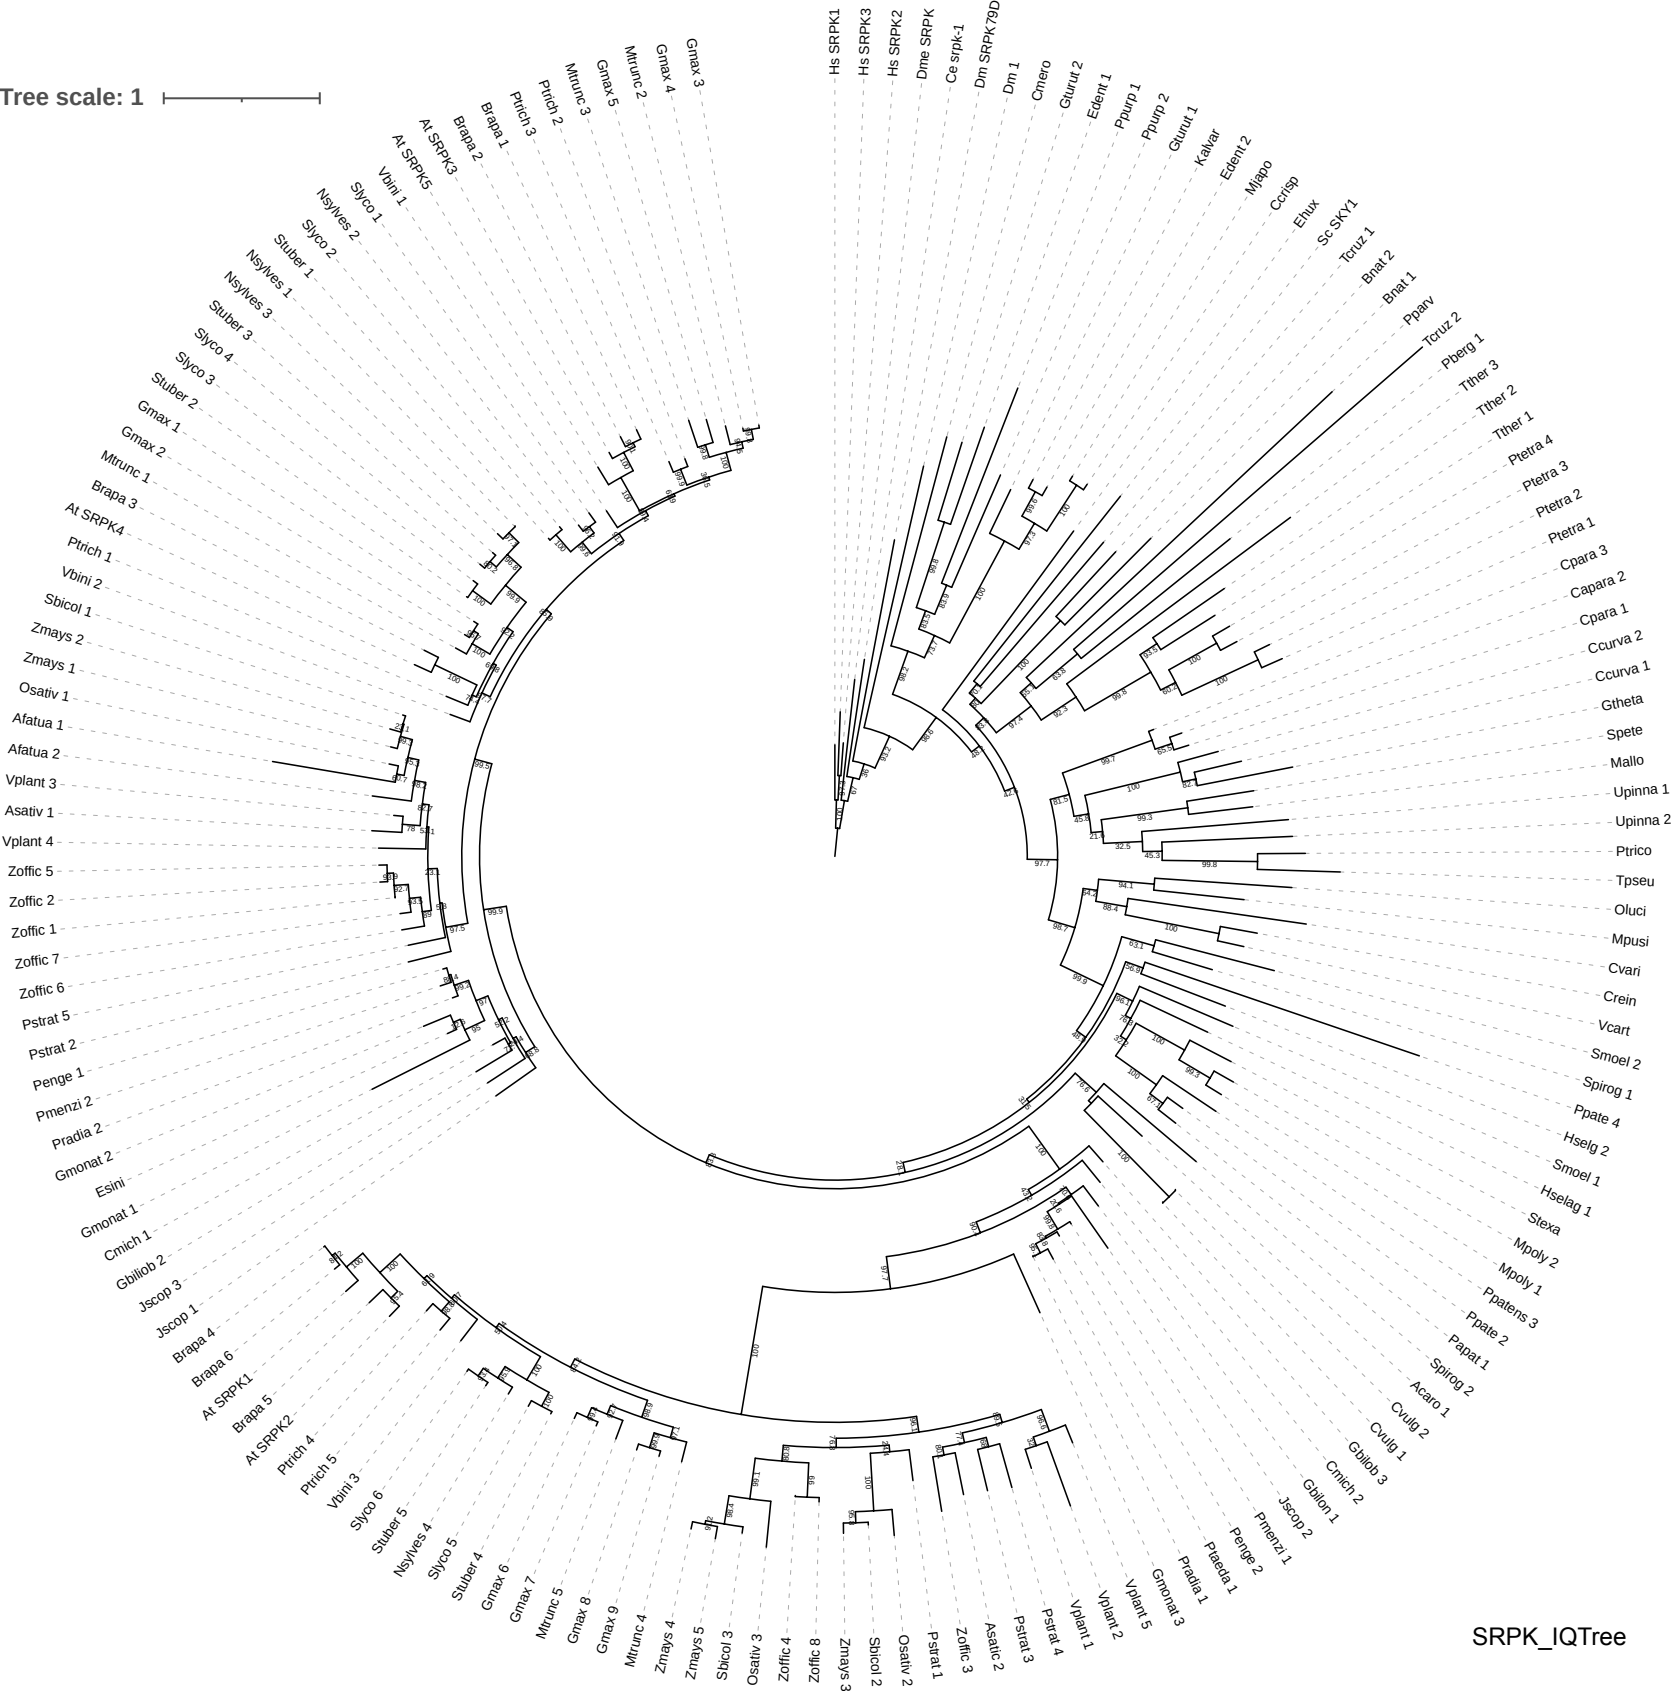

Tree scale: 1

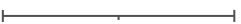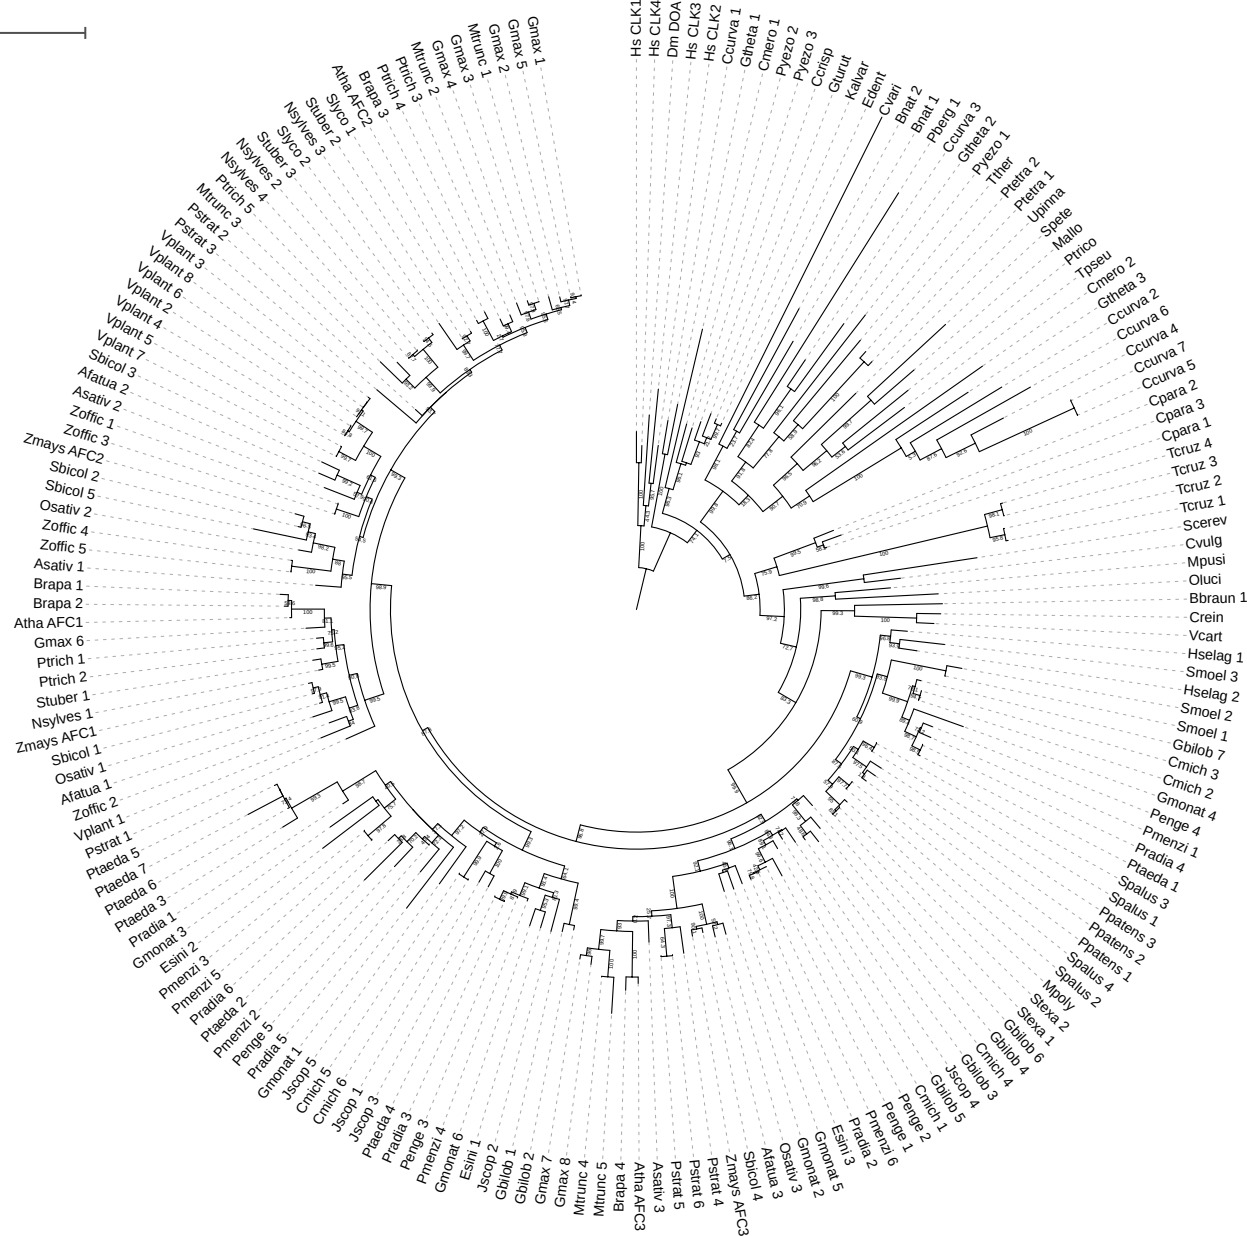

Tree scale: 10

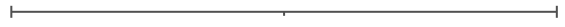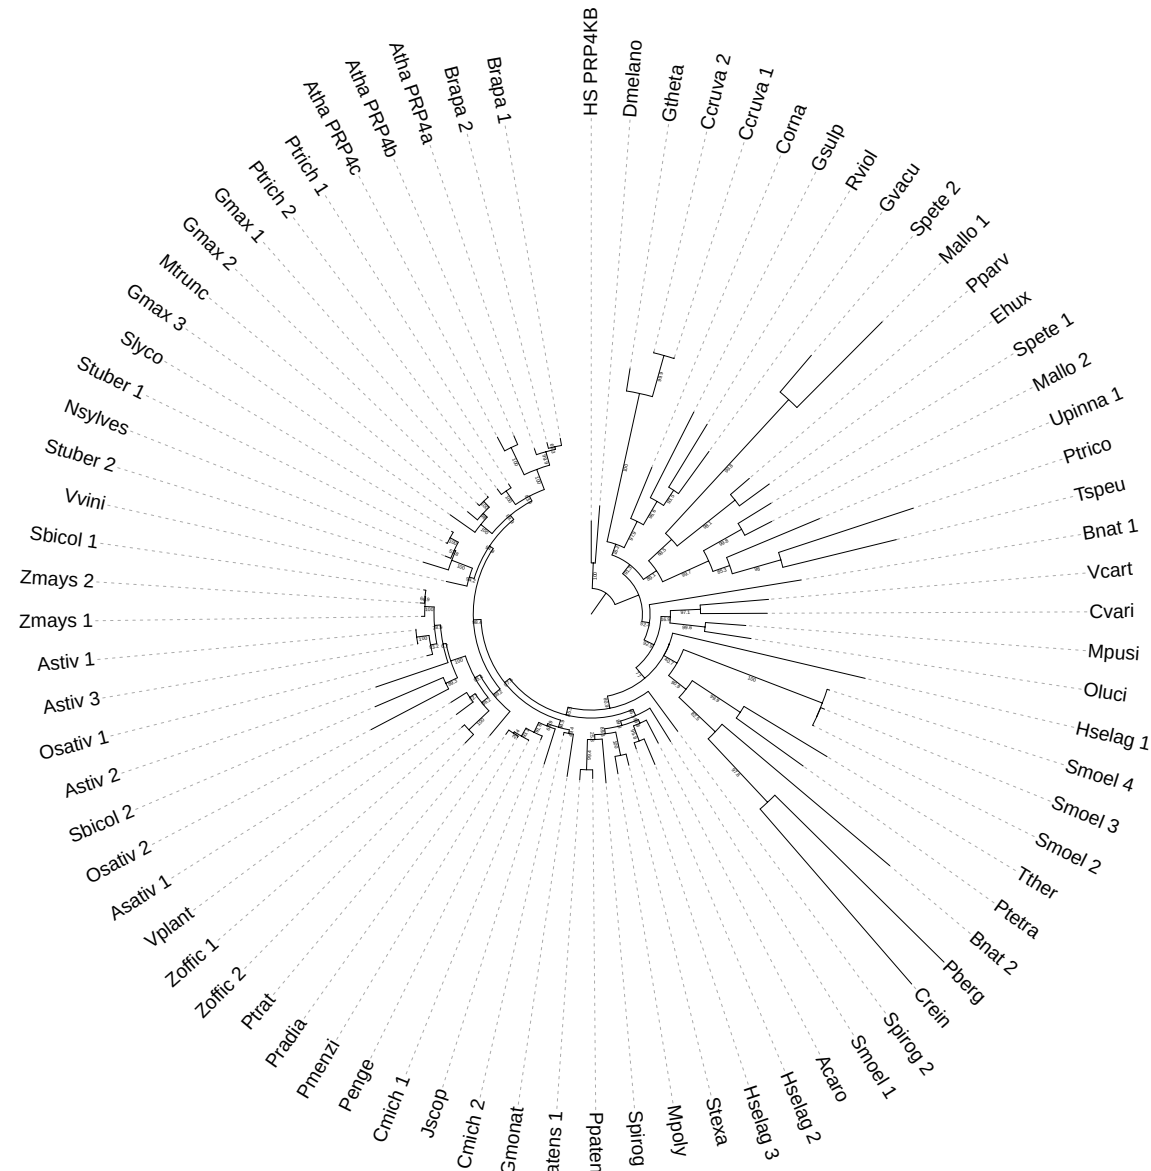

Tree scale: 1

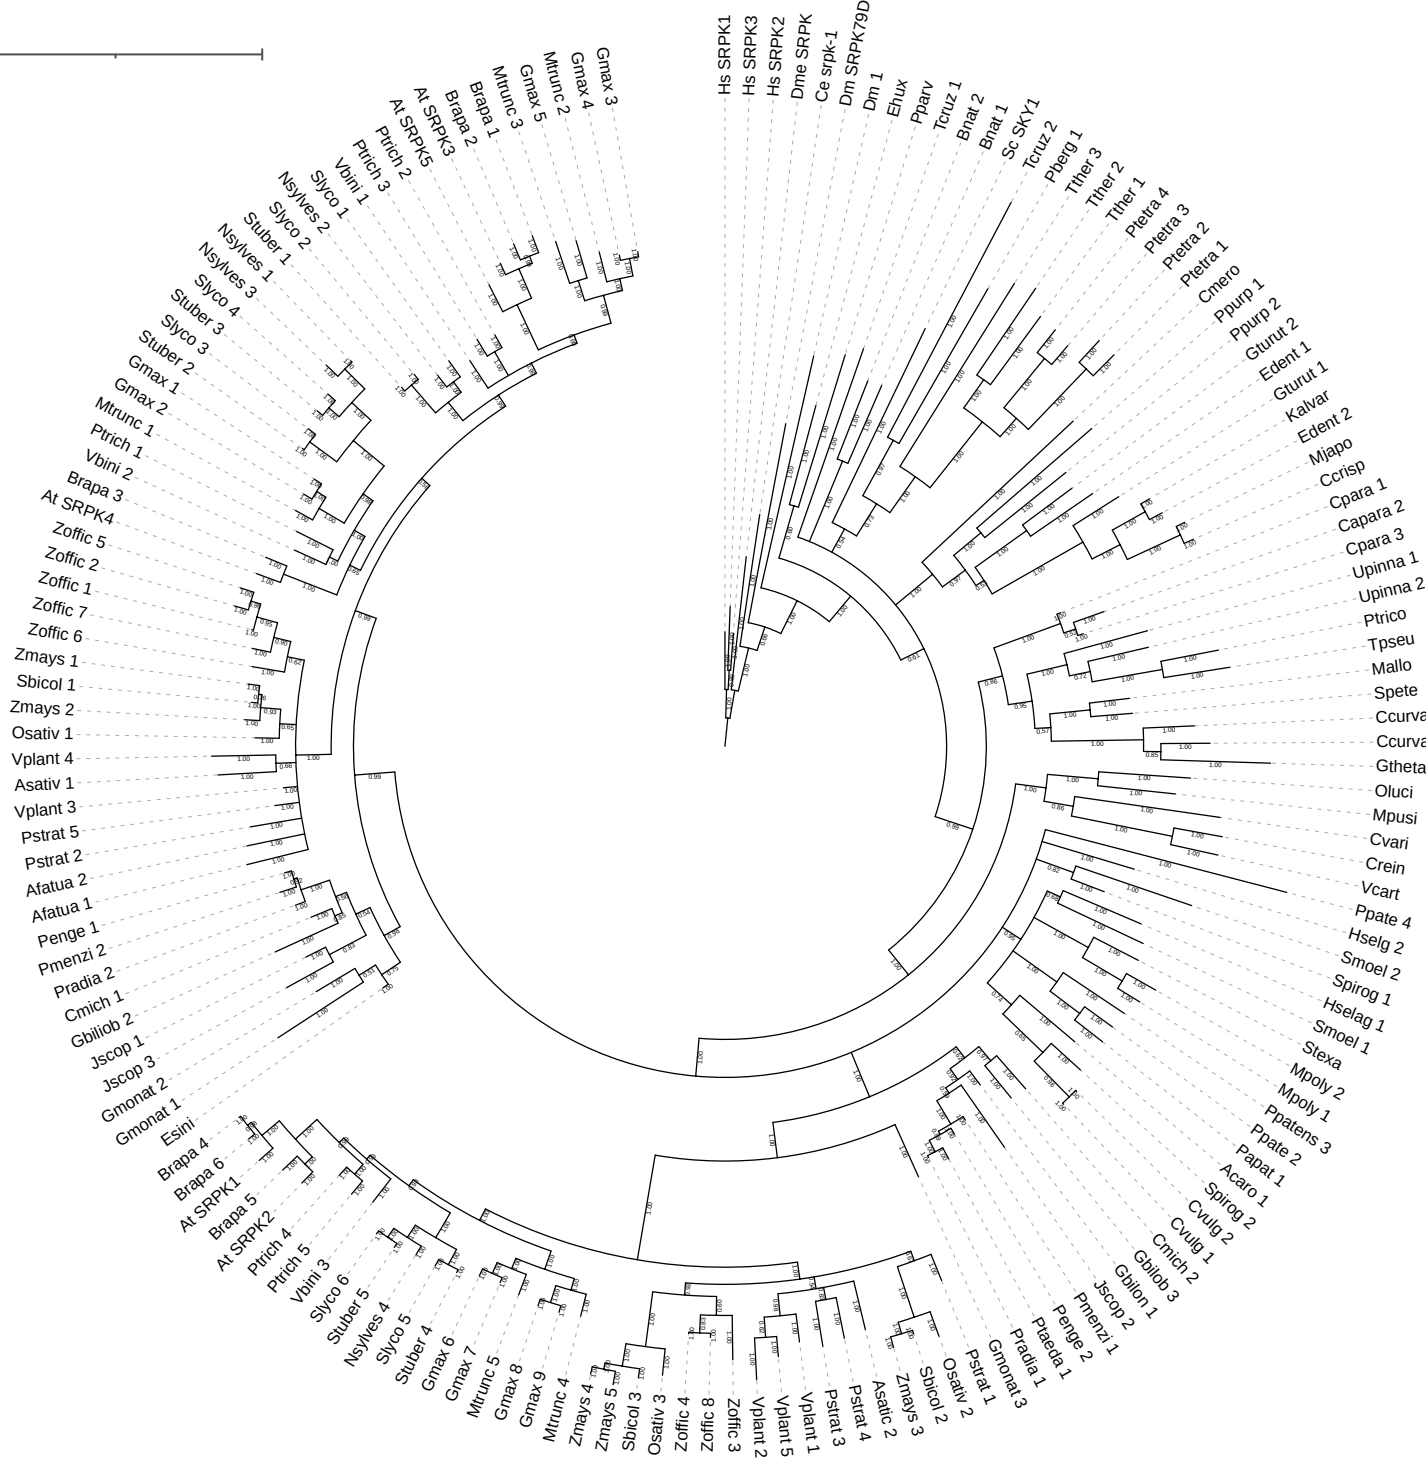

Tree scale: 1

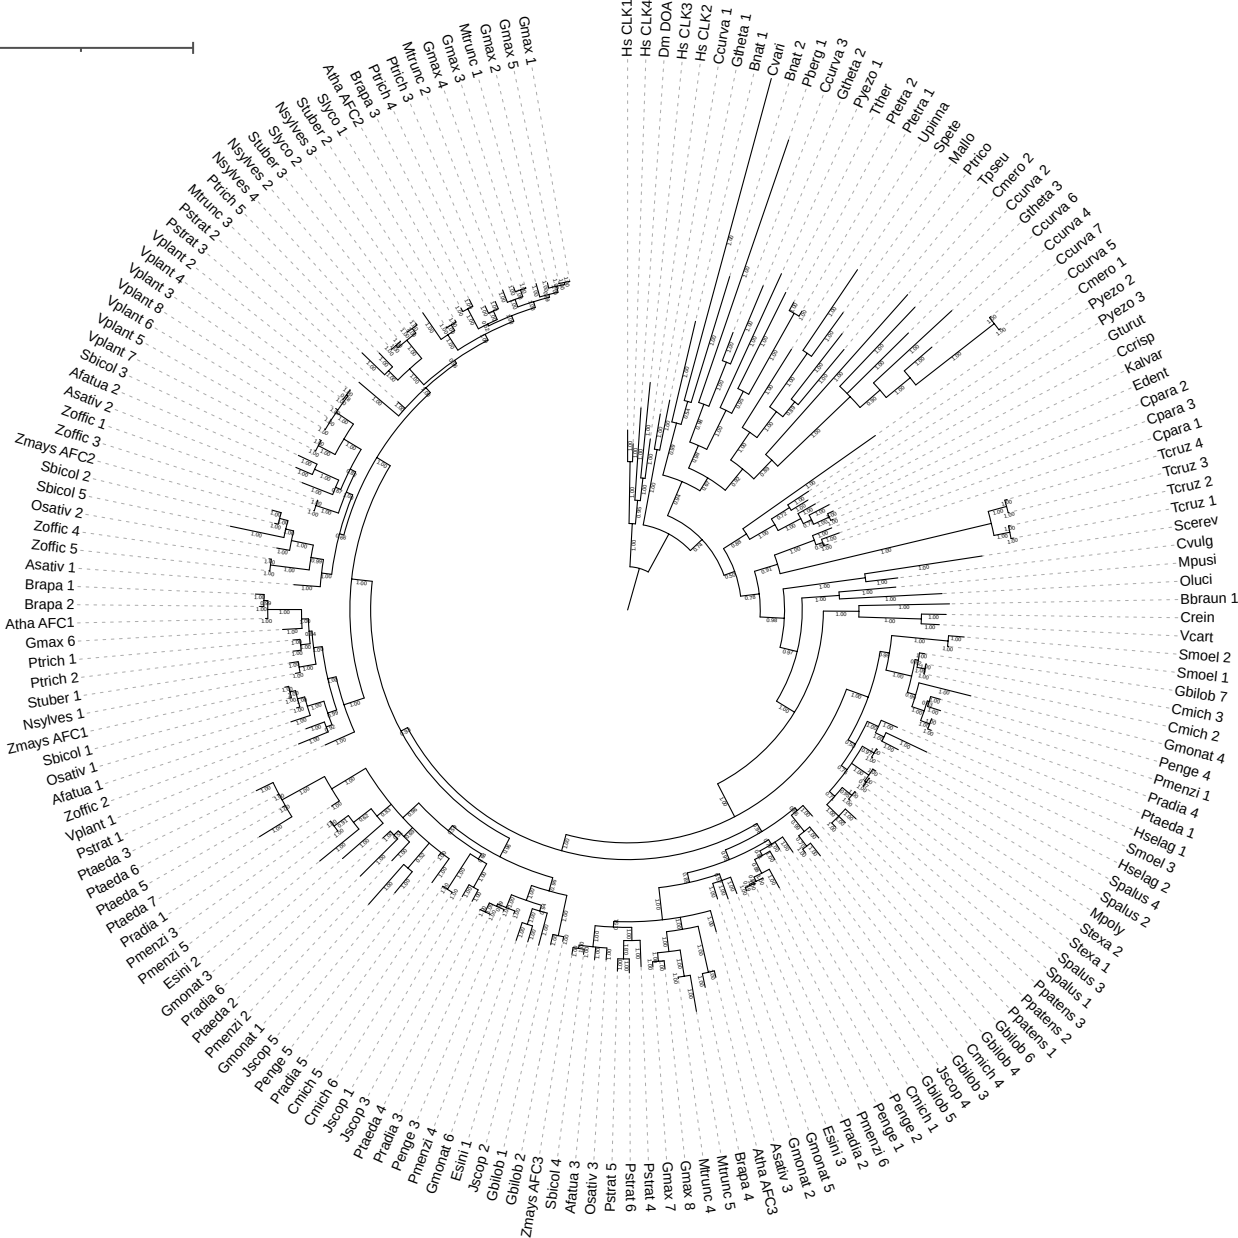

Tree scale: 1

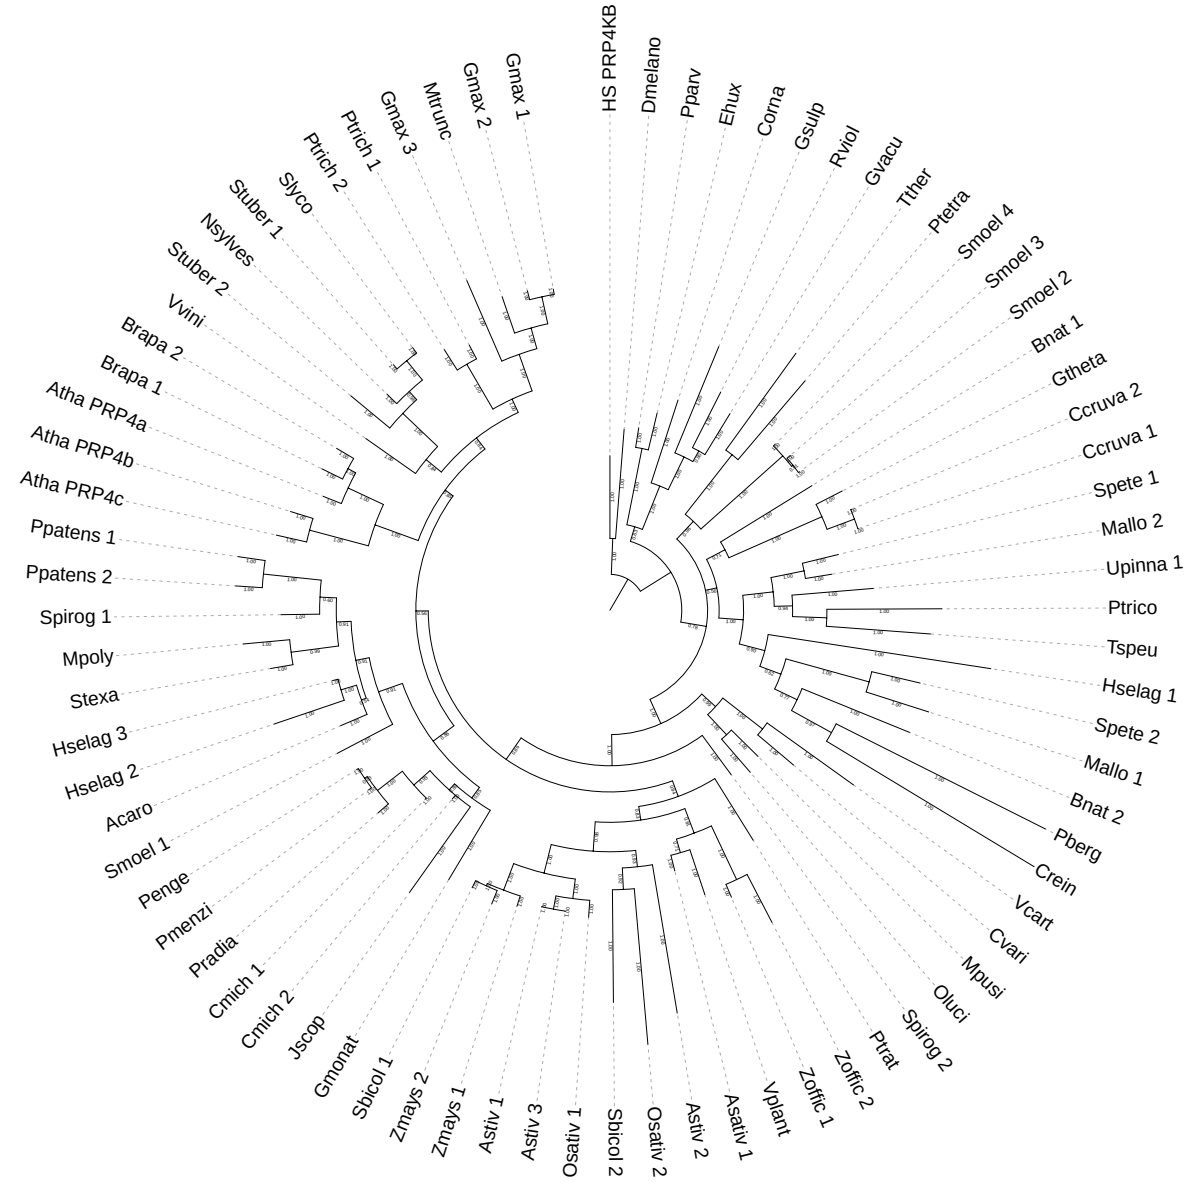

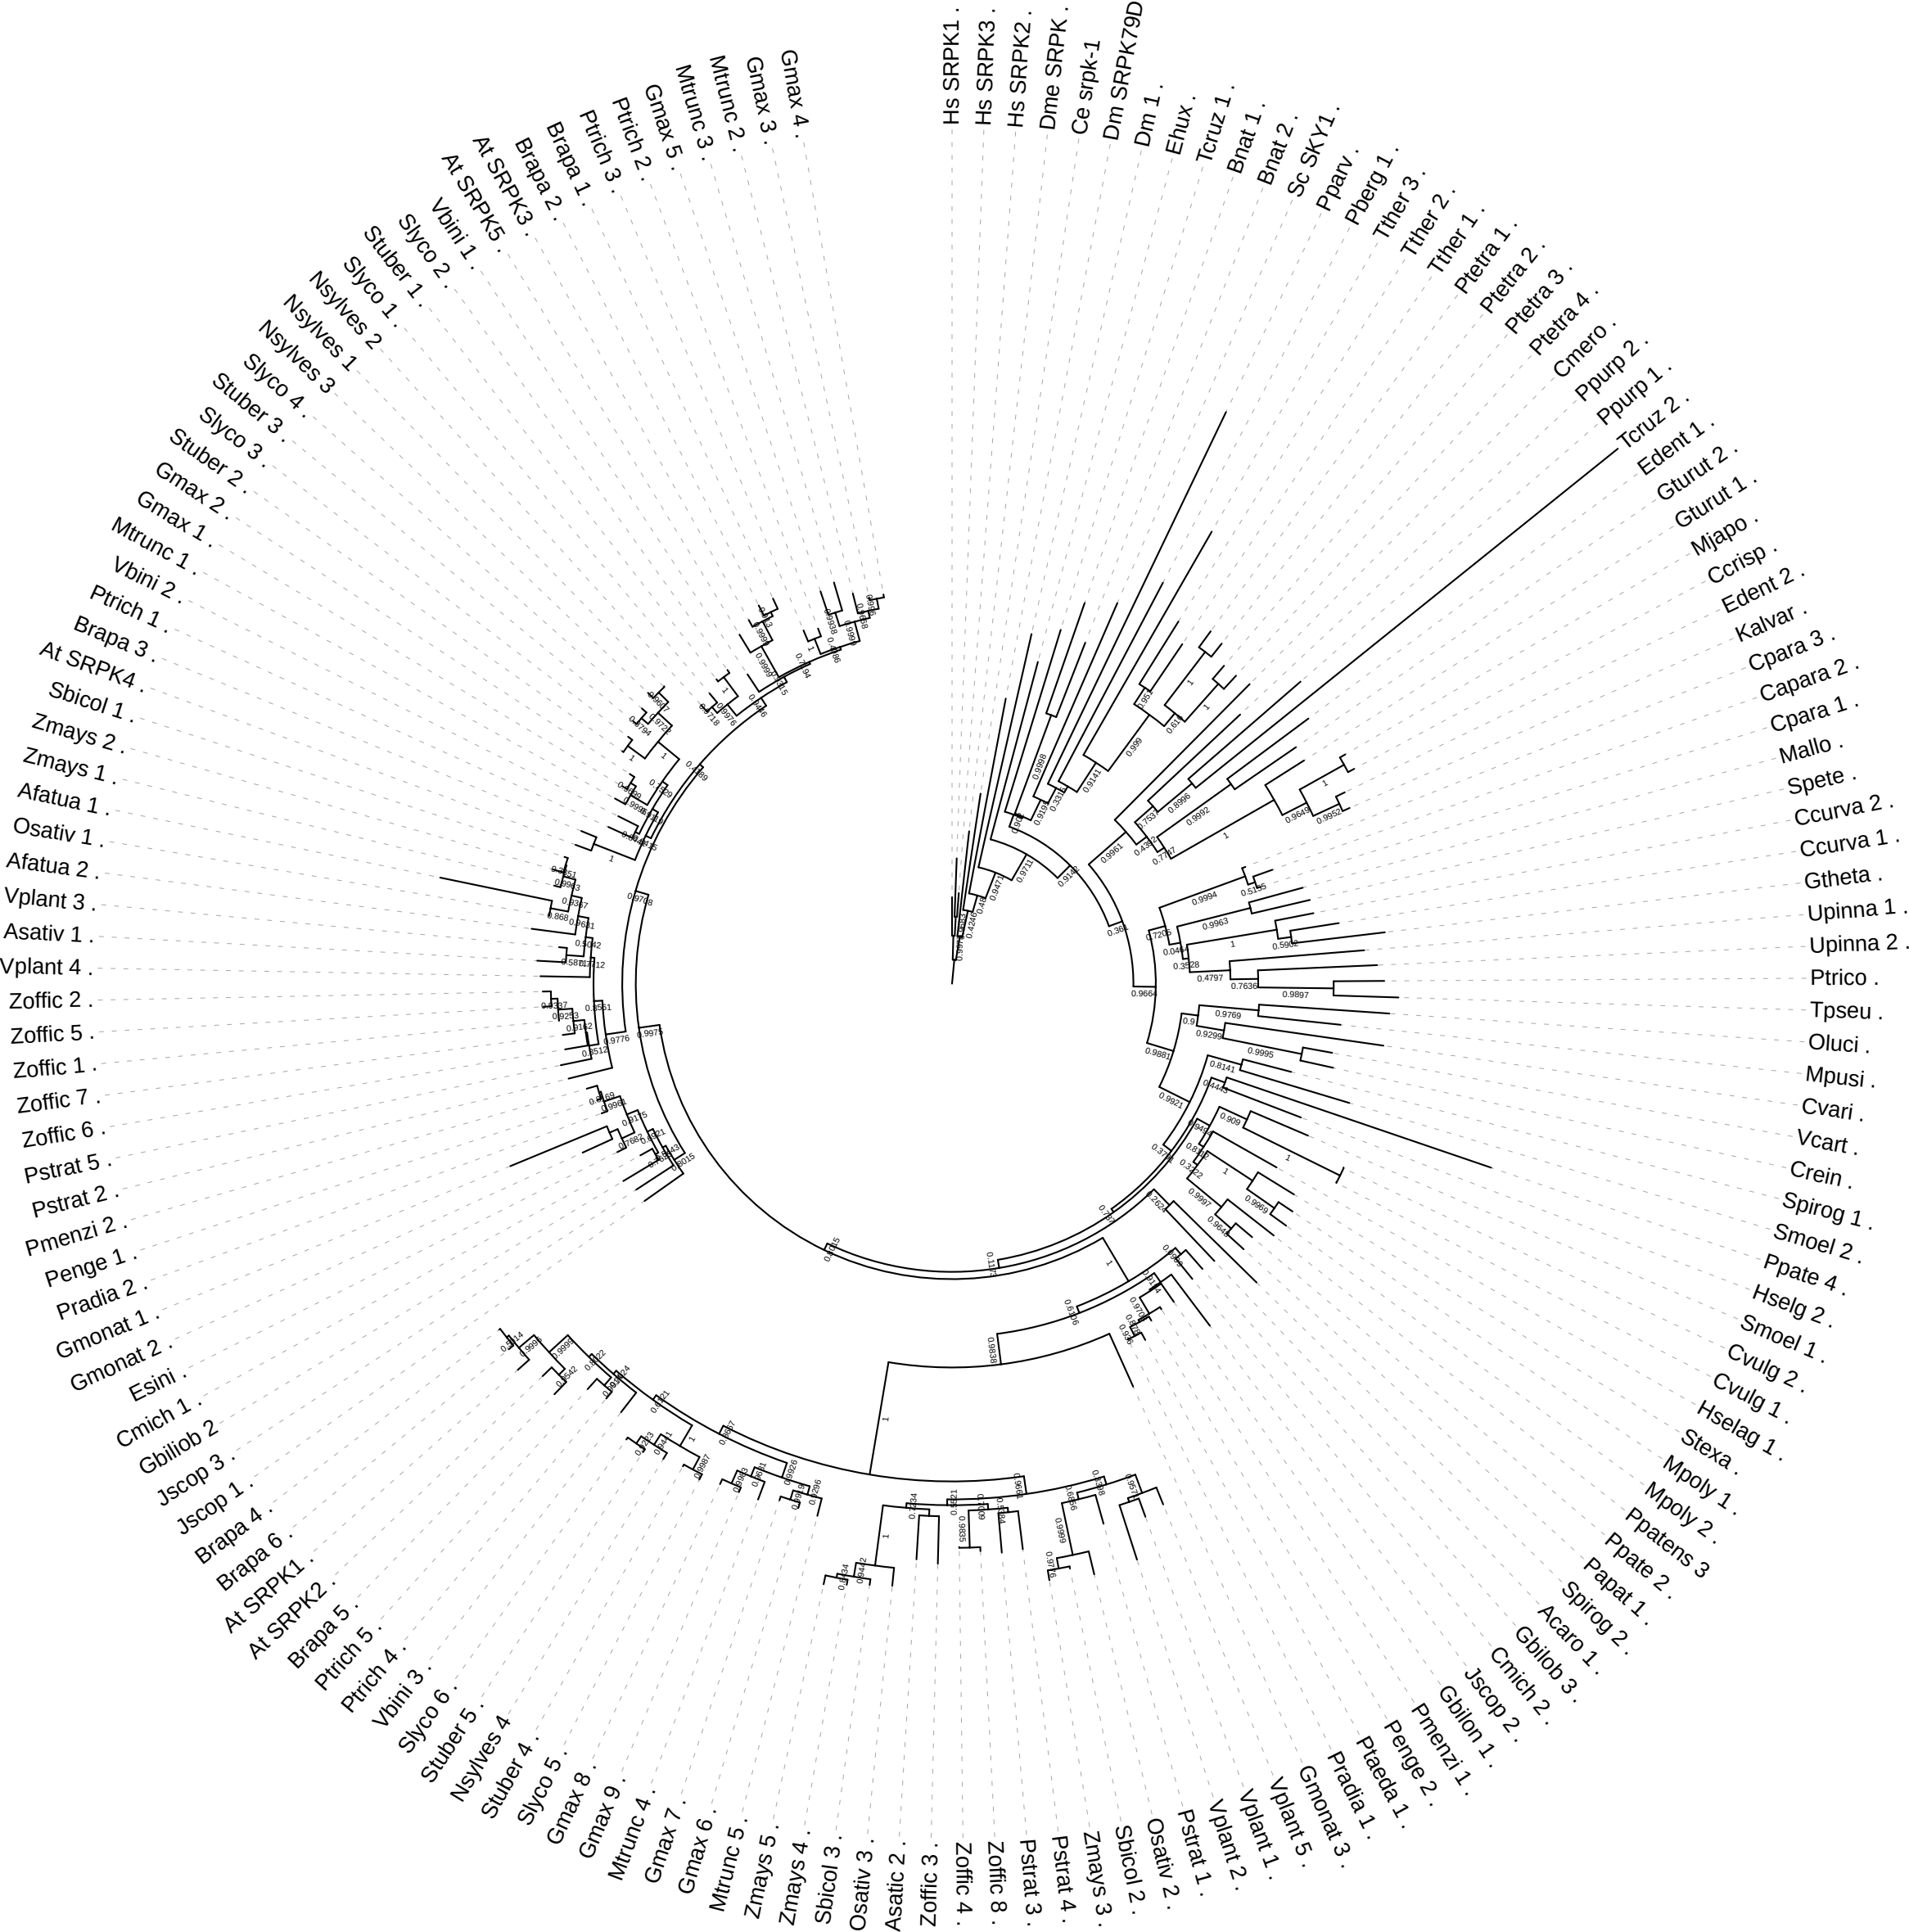



Tree scale: 1 

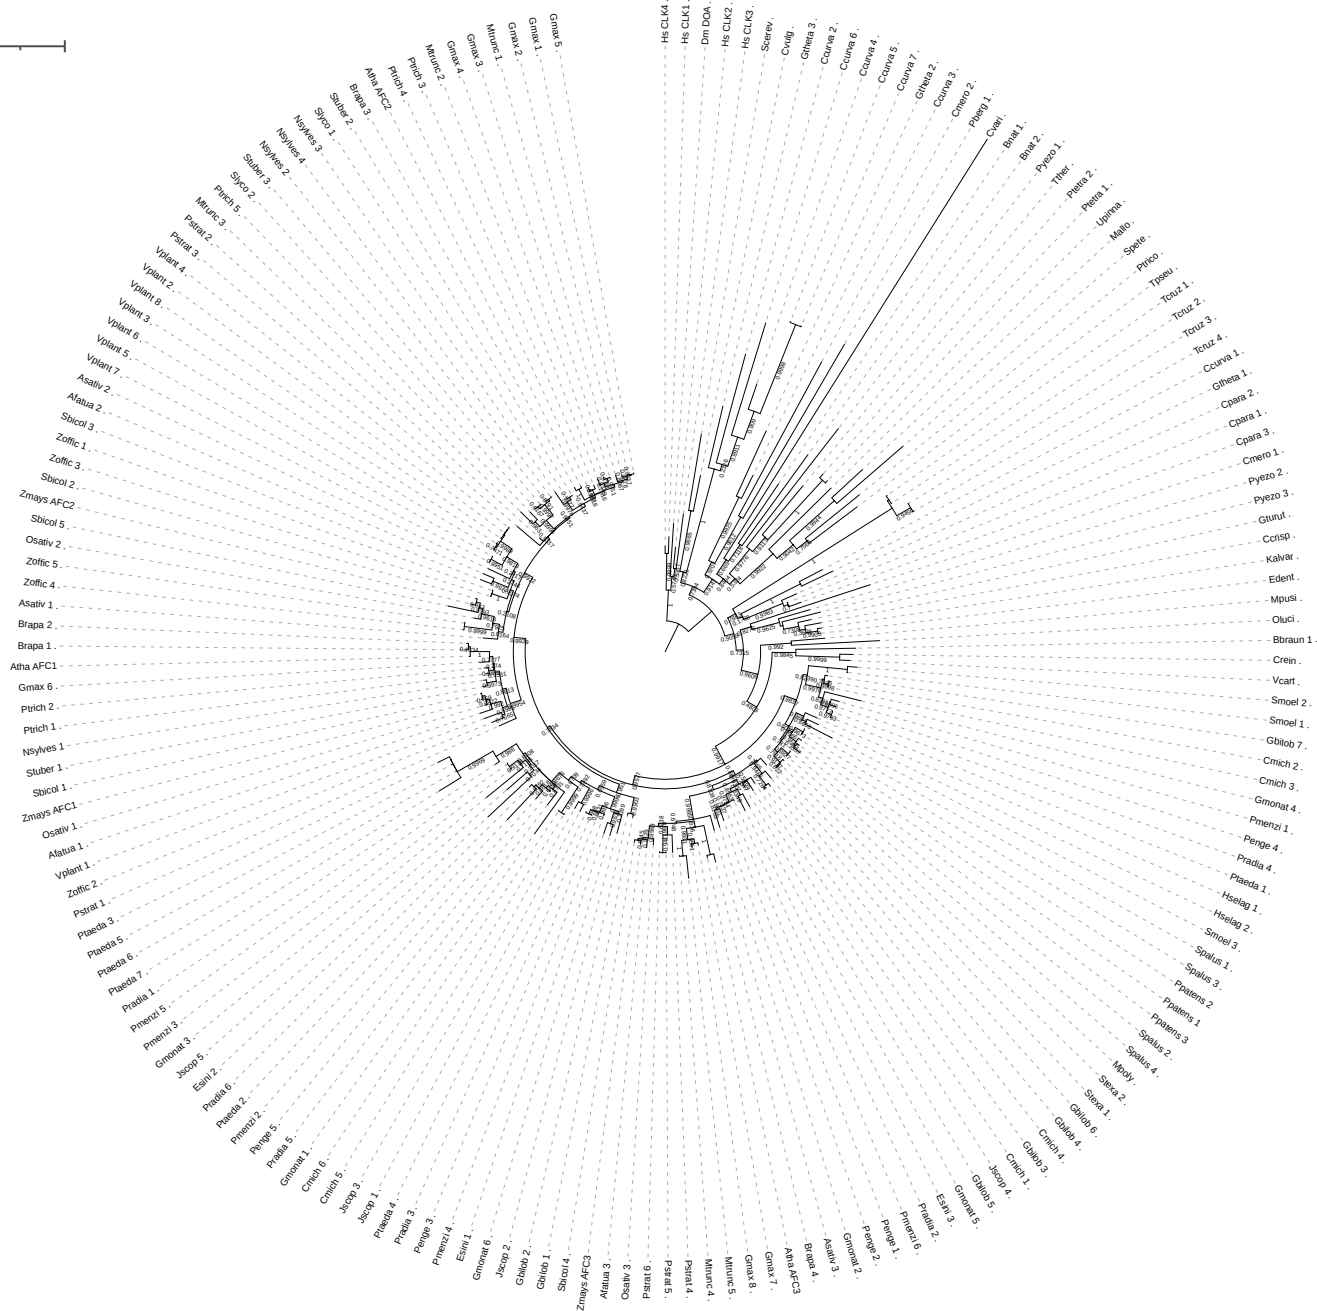

Tree scale: 1

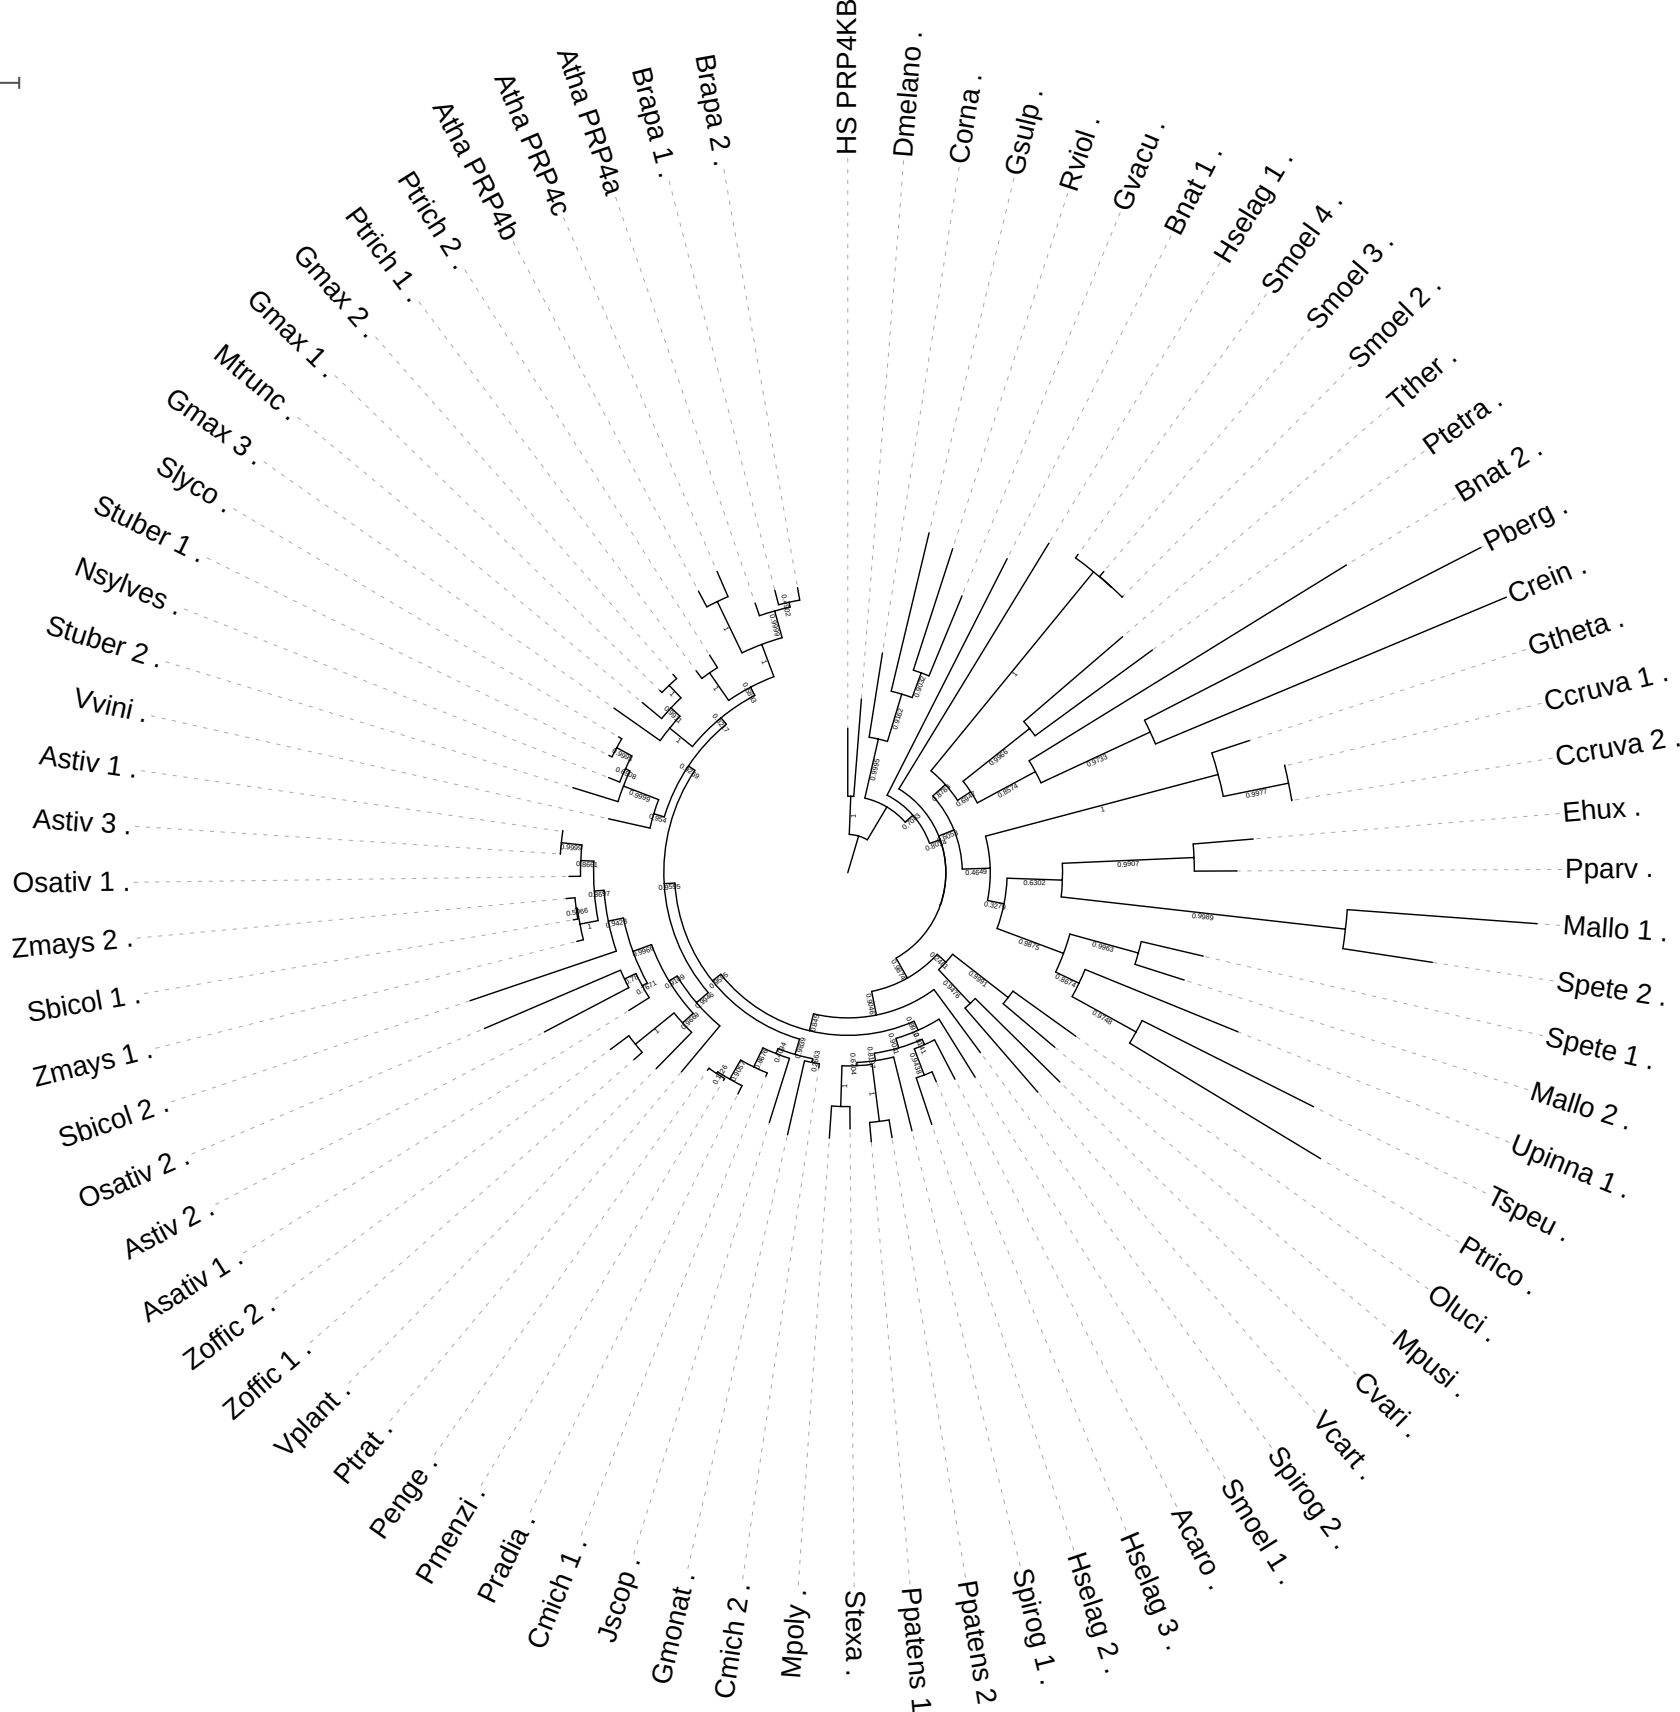

Supplement: 12870_2022_3870_MOESM5_ESM.pdf [file 12870_2022_3870_MOESM5_ESM.pdf]
