# Supplementary material for: Genome-scale analysis of Arabidopsis splicing-related protein kinase families reveals roles in abiotic stress adaptation
Source: PubMed Central journal article supplement (PMC9587599; doi:10.1186/s12870-022-03870-9), 2022-10-22

## SHOOTS

## ROOTS

PRP4KA

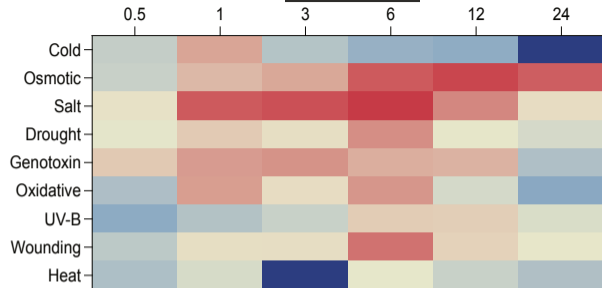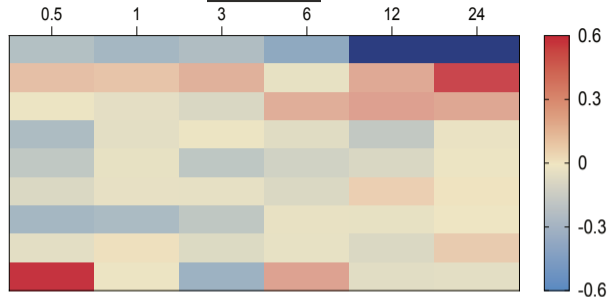

PRP4KB

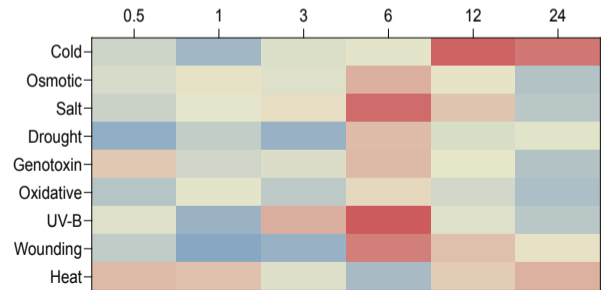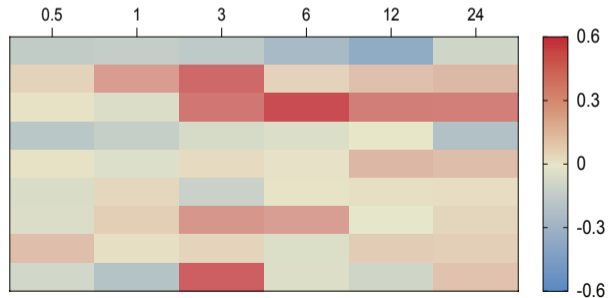

Supplement: 12870_2022_3870_MOESM19_ESM.pdf [file 12870_2022_3870_MOESM19_ESM.pdf]
