# Supplementary material for: Genome-scale analysis of Arabidopsis splicing-related protein kinase families reveals roles in abiotic stress adaptation
Source: PubMed Central journal article supplement (PMC9587599; doi:10.1186/s12870-022-03870-9), 2022-10-22
Supplement: 12870_2022_3870_MOESM20_ESM.pdf [file 12870_2022_3870_MOESM20_ESM.pdf]

SRPKs 24:0

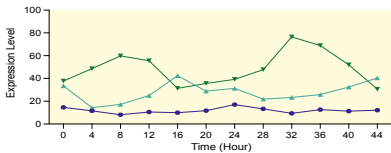

SRPKs 12:12

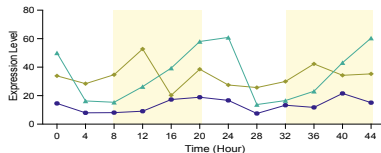

SRPKs 8:16

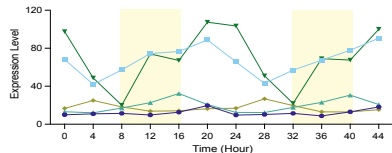

- SRPK1
- SRPK2
- SRPK3
- SRPK4
- SRPK5

AFCs 24:0

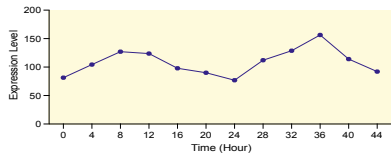

AFCs 12:12

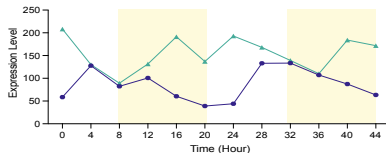

AFCs 8:16

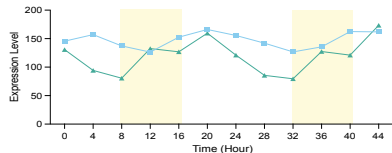

- AFC1
- AFC2
- AFC3

PRP4Ks 24:0

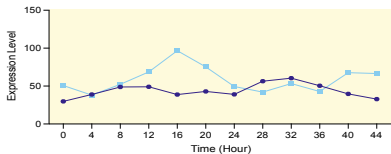

PRP4Ks 12:12

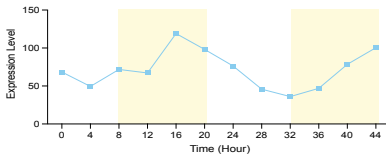

PRP4Ks 8:16

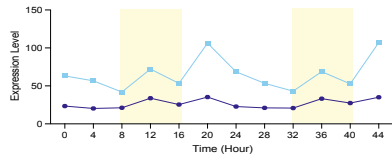

- PRP4A
- PRP4B
